# Supplementary material for: Improvement in pollutant controlling performance by modified aggregate structure in extensive green roof substrate layer
Source: Royal Society of Chemistry journal article supplement (doi:10.1039/d2ew00062h), 2022-01-01
Supplement: d2ew00062h1.xlsx [file d2ew00062h1.xlsx]

## Sheet: Original Data
1st Simulated Rainfall
Device	Sampling Time (min)
	5					10					20					30					40					50					60
	Outflow Volume (mL)	NH4 (mg/L)	NO3 (mg/L)	TN (mg/L）	TP (mg/L）	Outflow Volume (mL)	NH4 (mg/L)	NO3 (mg/L)	TN (mg/L）	TP (mg/L）	Outflow Volume (mL)	NH4 (mg/L)	NO3 (mg/L)	TN (mg/L）	TP (mg/L）	Outflow Volume (mL)	NH4 (mg/L)	NO3 (mg/L)	TN (mg/L）	TP (mg/L）	Outflow Volume (mL)	NH4 (mg/L)	NO3 (mg/L)	TN (mg/L）	TP (mg/L）	Outflow Volume (mL)	NH4 (mg/L)	NO3 (mg/L)	TN (mg/L）	TP (mg/L）	Outflow Volume (mL)	NH4 (mg/L)	NO3 (mg/L)	TN (mg/L）	TP (mg/L）
CN	96	0.979	14.511	21.08	0.183	107	0.776	13.245	18.131	0.103	223	0.489	12.744	19.281	0.114	203	0.442	9.456	15.102	0.128	226	0.9	5.035	10.271	0.108	215	0.682	8.34	12.62	0.184	84	0.601	6.95	11.564	0.374
P-0.5	48	0.838	9.562	9.147	0.147	97	0.783	5.545	6.004	0.038	201	0.643	5.726	5.875	0.201	230	0.733	2.433	6.039	0.017	195	0.691	1.607	4.045	0.021	209	0.607	4.21	6.606	0.056	222	0.565	2.555	3.633	0.101
P-1.0	81	1.746	10.981	12.655	0.023	73	1.514	6.745	8.406	0.248	192	1.041	2.152	4.594	0.122	219	1.746	3.584	7.195	0.112	205	1.431	2.447	5.029	0.085	220	1.431	3.648	7.151	0.179	209	1.333	2.176	7.796	0.008
P-1.5	112	2.51	7.591	11.854	0.089	116	1.433	2.704	4.431	0.049	261	1.601	3.949	7.476	0.157	243	1.656	2.32	4.605	0.078	251	1.083	1.245	2.862	0.086	253	1.518	3.534	5.476	0.083	99	1.239	1.837	3.483	0.012
P-2.0	111	1.026	5.688	7.463	0.075	93	0.86	3.292	4.754	0.387	220	1.055	4.833	6.544	0.178	208	0.724	1.669	3.514	0.147	216	0.763	1.116	3.667	0.095	220	0.863	4.819	6.304	0.237	107	0.461	3.026	3.729	0.11
P-2.5	107	2.07	3.62	8.637	0.097	107	1.678	3.196	6.772	0.094	256	1.239	6.038	9.348	0.106	237	0.498	1.837	2.866	0.102	247	1.041	1.762	3.623	0.191	258	0.985	2.014	3.986	0.435	123	1.717	1.967	5.323	0.137
B-0.5	90	2.217	10.674	20.562	0.275	105	2.03	7.578	13.793	0.149	226	1.358	5.287	6.651	0.034	233	0.446	5.564	5.1	0.139	249	1.082	3.398	5.903	0.123	222	1.354	5.627	8.177	0.258	175	0.692	3.407	4.055	0.296
B-1.0	103	2.148	7.9	9.769	0.41	127	1.279	5.847	9.029	0.191	254	1.403	5.541	7.061	0.11	244	1.245	4.828	8.513	0.328	248	0.921	6.924	7.523	0.205	279	1.233	6.827	5.97	0.317	150	1.046	8.336	6.025	0.171
B-1.5	102	1.219	10.4	18.147	0.268	115	1.243	4.498	12.934	0.207	240	1.365	6.28	12.999	0.355	243	2.682	5.961	10.717	0.558	259	1.961	9.863	10.554	0.084	222	2.932	9.506	6.751	0.131	177	1.135	9.176	8.632	0.279
B-2.0	85	2.114	11.928	17.589	0.368	148	4.242	5.521	14.904	0.309	200	2.645	7.033	14.877	0.622	207	2.076	6.258	10.51	0.849	218	2.728	7.958	10.38	0.261	225	1.955	9.115	8.729	0.296	140	1.595	10.449	9.803	0.411
B-2.5	88	1.4	9.746	17.04	0.443	123	2.793	10.589	17.373	0.328	224	3.401	9.675	12.278	0.554	237	2.345	8.293	11.148	0.724	250	2.318	7.434	11.196	0.623	223	3.012	7.461	10.411	0.501	119	2.71	8.336	9.904	0.681
2nd Simulated Rainfall
Device	Sampling Time (min)
	5					10					20					30					40					50					60
	Outflow Volume (mL)	NH4 (mg/L)	NO3 (mg/L)	TN (mg/L）	TP (mg/L）	Outflow Volume (mL)	NH4 (mg/L)	NO3 (mg/L)	TN (mg/L）	TP (mg/L）	Outflow Volume (mL)	NH4 (mg/L)	NO3 (mg/L)	TN (mg/L）	TP (mg/L）	Outflow Volume (mL)	NH4 (mg/L)	NO3 (mg/L)	TN (mg/L）	TP (mg/L）	Outflow Volume (mL)	NH4 (mg/L)	NO3 (mg/L)	TN (mg/L）	TP (mg/L）	Outflow Volume (mL)	NH4 (mg/L)	NO3 (mg/L)	TN (mg/L）	TP (mg/L）	Outflow Volume (mL)	NH4 (mg/L)	NO3 (mg/L)	TN (mg/L）	TP (mg/L）
CN	83	0.694	14.118	14.415	0.252	123	0.955	6.435	15.056	0.143	281	0.524	6.465	14.298	0.078	285	0.839	7.215	8.347	0.345	246	0.777	10.733	12.339	0.141	278	0.677	10.064	11.792	0.14	172	0.559	11.347	12.808	0.198
P-0.5	93	0.634	4.26	4.376	0.075	93	1.335	3.153	6.338	0.035	224	1.376	2.988	6.639	0.021	212	0.992	2.603	3.422	0.103	220	1.048	3.733	5.104	0.011	224	1.256	3.681	5.083	0.027	227	1.264	4.495	5.835	0.087
P-1.0	70	1.115	4.212	5.122	0.045	85	1.876	3.276	5.322	0.014	206	2.652	3.67	10.106	0.045	236	1.372	3.011	4.31	0.179	248	1.713	3.218	5.251	0.03	240	1.256	3.493	5.951	0.062	215	1.734	3.975	5.921	0.075
P-1.5	83	1.854	4.098	6.675	0.063	110	2.237	1.772	7.491	0.047	231	2.059	2.475	6.418	0.079	220	1.518	2.349	4.359	0.103	212	1.303	3.887	6.361	0.089	222	2.392	3.746	7.055	0.071	114	1.594	3.616	6.51	0.097
P-2.0	99	0.985	3.133	5.337	0.112	94	1.844	1.955	6.893	0.071	213	1.263	2.139	4.987	0.095	202	0.902	2.128	3.854	0.203	191	1.352	3.672	6.349	0.253	204	1.121	3.707	6.71	0.142	121	1.03	3.642	6.415	0.133
P-2.5	72	0.91	4.228	4.725	0.18	121	1.836	1.957	5.44	0.045	227	1.945	2.493	7.897	0.17	222	1.28	2.218	3.74	0.158	213	1.729	2.82	5.37	0.081	252	1.987	3.23	6.186	0.114	117	1.957	3.704	6.245	0.171
B-0.5	84	0.804	5.369	6.524	0.189	102	1.614	3.544	10.465	0.143	245	1.006	3.904	6.588	0.143	227	0.789	3.463	4.889	0.13	227	1.038	5.986	8.596	0.162	242	0.744	5.726	7.207	0.06	160	0.607	6.172	7.468	0.127
B-1.0	60	1.895	8.247	12.09	0.15	79	1.082	7.243	8.564	0.097	197	1.208	9.433	10.628	0.131	172	1.25	7.768	7.992	0.159	198	0.818	4.998	6.888	0.524	206	1.146	3.067	6.629	0.137	130	0.935	7.135	7.187	0.713
B-1.5	84	3.178	8.717	12.658	0.369	81	2.91	8.281	10.984	0.123	206	1.946	8.927	12.348	0.23	198	0.64	7.301	9.787	0.378	206	1.551	6.068	8.036	0.333	204	1.941	3.896	6.972	0.366	134	0.992	7.256	7.853	0.403
B-2.0	87	0.688	7.701	13.975	0.342	83	0.652	7.634	11.391	0.168	222	1.206	7.701	11.371	0.324	211	1.386	8.862	10.511	0.41	227	1.9	7.158	8.608	0.88	240	2.773	4.773	8.479	0.29	129	1.566	6.47	9.427	0.317
B-2.5	72	3.084	19.015	14.616	0.89	95	4.107	10.353	12.306	1.115	239	0.703	10.126	11.13	0.201	225	1.185	4.558	10.996	0.413	239	2.322	3.064	9.597	0.548	236	1.618	7.47	9.264	0.81	125	2.336	4.875	9.224	0.775
3rd Simulated Rainfall
Device	Sampling Time (min)
	5					10					20					30					40					50					60
	Outflow Volume (mL)	NH4 (mg/L)	NO3 (mg/L)	TN (mg/L）	TP (mg/L）	Outflow Volume (mL)	NH4 (mg/L)	NO3 (mg/L)	TN (mg/L）	TP (mg/L）	Outflow Volume (mL)	NH4 (mg/L)	NO3 (mg/L)	TN (mg/L）	TP (mg/L）	Outflow Volume (mL)	NH4 (mg/L)	NO3 (mg/L)	TN (mg/L）	TP (mg/L）	Outflow Volume (mL)	NH4 (mg/L)	NO3 (mg/L)	TN (mg/L）	TP (mg/L）	Outflow Volume (mL)	NH4 (mg/L)	NO3 (mg/L)	TN (mg/L）	TP (mg/L）	Outflow Volume (mL)	NH4 (mg/L)	NO3 (mg/L)	TN (mg/L）	TP (mg/L）
CN	90	1.231	9.995	10.898	0.244	121	0.762	10.859	9.781	0.254	262	0.664	9.922	9.695	0.287	274	0.502	8.505	7.815	0.267	281	0.938	7.624	13.75	0.195	304	0.854	7.652	12.598	0.078	171	0.923	8.549	11.67	0.294
P-0.5	100	0.47	3.967	3.604	0.072	130	1.289	3.86	5.001	0.168	248	0.304	3.485	5.746	0.075	265	0.829	2.84	3.509	0.064	261	1.283	3.666	5.039	0.037	263	1.483	1.791	4.561	0.002	273	1.251	3.65	4.885	0.05
P-1.0	89	0.528	3.954	4.441	0.001	109	0.5	3.473	4.161	0.042	204	0.925	4.523	6.419	0.138	220	1.063	3.724	4.075	0.022	234	1.458	2.396	4.307	0.059	232	2.127	1.47	5.108	0.007	232	1.202	3.421	4.304	0.049
P-1.5	56	2.2	3.497	5.362	0.101	100	3.118	3.198	5.735	0.126	214	0.971	3.432	4.888	0.022	215	0.765	2.918	3.406	0.046	229	1.729	2.906	5.162	0.062	219	1.356	2.11	5.697	0.091	197	2.196	3.225	5.546	0.087
P-2.0	106	2.048	3.55	4.805	0.251	102	2.728	3.373	5.948	0.06	223	0.467	3.636	4.777	0.019	198	0.787	2.973	3.394	0.1	216	1.542	2.471	5.666	0.154	206	1.075	1.586	5.232	0.058	125	1.551	2.955	5.535	0.167
P-2.5	92	0.876	2.825	4.223	0.181	113	0.89	3.055	5.036	0.226	236	0.966	3.283	7.141	0.135	239	1.902	2.846	4.432	0.134	233	1.362	2.432	4.583	0.197	241	1.978	1.657	5.084	0.035	80	0.836	3.195	5.447	0.3
B-0.5	68	0.247	5.381	5.213	0.177	104	1.32	5.334	8.391	0.025	213	0.139	5.381	4.862	0.046	231	0.582	6.192	4.674	0.115	215	1.692	5.001	7.334	0.402	224	0.868	3.335	5.981	0.013	163	1.147	4.52	5.883	0.168
B-1.0	64	1.226	17.796	10.245	0.311	102	0.971	6.615	9.375	0.421	233	1.19	9.484	9.543	0.364	254	0.828	4.781	8.05	0.252	216	0.875	2.903	6.42	0.448	237	0.939	7.864	6.352	0.319	170	0.517	4.251	6.222	0.39
B-1.5	68	1.201	9.626	12.936	0.331	97	2.409	8.241	11.236	0.327	218	1.502	15.391	11.915	0.376	206	1.179	4.673	9.899	0.343	194	1.549	4.381	9.503	0.253	208	1.11	4.942	4.973	0.107	149	0.906	4.823	7.607	0.358
B-2.0	81	2.171	12.748	13.938	0.537	108	1.707	5.784	11.79	1.243	230	1.051	5.865	12.209	0.597	215	0.963	6.499	10.011	0.415	226	1.907	9.691	9.596	0.231	223	1.459	8.859	8.195	0.016	99	1.315	9.83	8.618	0.359
B-2.5	72	0.838	9.66	13.527	0.895	142	1.763	7.144	12.167	0.684	211	1.818	7.581	10.418	0.84	239	1.311	6.687	9.712	0.322	252	1.384	7.362	8.611	0.684	249	1.659	7.758	8.438	0.432	177	1.67	7.661	8.318	0.048
4th Simulated Rainfall
Device	Sampling Time (min)
	5					10					20					30					40					50					60
	Outflow Volume (mL)	NH4 (mg/L)	NO3 (mg/L)	TN (mg/L）	TP (mg/L）	Outflow Volume (mL)	NH4 (mg/L)	NO3 (mg/L)	TN (mg/L）	TP (mg/L）	Outflow Volume (mL)	NH4 (mg/L)	NO3 (mg/L)	TN (mg/L）	TP (mg/L）	Outflow Volume (mL)	NH4 (mg/L)	NO3 (mg/L)	TN (mg/L）	TP (mg/L）	Outflow Volume (mL)	NH4 (mg/L)	NO3 (mg/L)	TN (mg/L）	TP (mg/L）	Outflow Volume (mL)	NH4 (mg/L)	NO3 (mg/L)	TN (mg/L）	TP (mg/L）	Outflow Volume (mL)	NH4 (mg/L)	NO3 (mg/L)	TN (mg/L）	TP (mg/L）
CN	81	0.912	14.709	14.661	0.201	119	0.717	13.314	12.505	0.331	255	0.441	12.515	12.99	0.293	255	0.404	9.417	10.318	0.168	261	0.801	4.876	6.825	0.129	260	0.613	8.152	8.463	0.145	163	0.552	6.954	7.938	0.018
P-0.5	97	2.06	8.894	9.533	0.166	84	1.806	4.842	5.875	0.038	184	1.406	4.736	5.446	0.02	247	1.697	2.132	5.928	0.057	253	1.629	1.433	4.04	0.057	231	1.332	3.494	6.143	0.04	253	1.332	2.28	3.633	0.013
P-1.0	51	2.45	10.835	11.027	0.121	97	1.893	5.93	6.527	0.04	169	1.333	1.94	3.657	0.025	210	2.339	3.376	5.986	0.036	214	1.907	2.293	4.162	0.043	222	1.804	3.234	5.598	0.037	223	1.705	1.957	6.194	0.041
P-1.5	109	1.809	7.458	9.691	0.118	97	1.077	2.772	3.78	0.09	230	1.182	3.975	6.26	0.111	225	1.049	2.004	3.31	0.042	230	0.776	1.216	2.326	0.09	227	1.038	3.296	4.25	0.057	103	0.881	1.781	2.811	0.006
P-2.0	115	1.296	4.502	6.358	0.076	90	1.027	2.464	3.83	0.095	227	1.259	3.613	5.265	0.077	202	0.875	1.263	2.863	0.036	223	0.925	0.848	2.998	0.042	212	0.992	3.472	4.889	0.036	120	0.546	2.244	2.976	0.003
P-2.5	99	2.311	3.852	7.877	0.153	112	1.817	3.298	5.99	0.233	233	1.326	6.159	8.174	0.101	230	0.532	1.87	2.501	0.034	233	1.087	1.753	3.09	0.034	230	1.015	1.977	3.355	0.033	98	1.767	1.93	4.475	0.018
B-0.5	85	1.296	8.883	17.343	0.164	118	1.123	5.969	11.01	0.153	262	0.718	3.982	5.077	0.335	262	0.251	4.457	4.14	0.051	268	0.616	2.756	4.853	0.055	262	0.718	4.247	6.255	0.057	173	0.392	2.751	3.318	0.04
B-1.0	77	1.115	5.239	8.395	0.006	113	1.485	3.331	7.454	0.188	241	0.254	3.787	7.012	0.59	250	0.428	3.6	5.593	0.084	238	0.839	6.001	5.445	0.263	241	0.585	6.058	5.857	0.029	146	0.844	5.993	5.076	0.207
B-1.5	70	1.351	6.492	11.773	0.463	95	0.836	4.382	10.062	0.596	199	0.729	4.949	10.294	0.107	202	0.551	4.582	8.699	0.214	207	1.029	7.238	6.641	0.264	203	0.937	7.345	4.93	0.388	132	1.013	7.479	6.002	0.351
B-2.0	69	0.881	7.859	12.729	0.785	107	1.682	8.086	11.65	0.2	186	1.197	7.515	9.833	0.059	226	0.817	6.333	8.66	0.323	219	1.183	5.719	8.142	0.475	222	0.981	6.062	6.995	0.207	121	0.907	6.019	6.555	0.536
B-2.5	65	0.674	7.769	12.206	0.516	114	1.078	7.196	10.489	0.455	203	1.444	9.008	8.904	0.653	217	0.803	6.498	7.048	0.349	258	1.033	4.966	6.362	0.387	203	0.735	2.825	6.099	0.214	153	0.88	6.737	6.23	0.272
5th Simulated Rainfall
Device	Sampling Time (min)
	5					10					20					30					40					50					60
	Outflow Volume (mL)	NH4 (mg/L)	NO3 (mg/L)	TN (mg/L）	TP (mg/L）	Outflow Volume (mL)	NH4 (mg/L)	NO3 (mg/L)	TN (mg/L）	TP (mg/L）	Outflow Volume (mL)	NH4 (mg/L)	NO3 (mg/L)	TN (mg/L）	TP (mg/L）	Outflow Volume (mL)	NH4 (mg/L)	NO3 (mg/L)	TN (mg/L）	TP (mg/L）	Outflow Volume (mL)	NH4 (mg/L)	NO3 (mg/L)	TN (mg/L）	TP (mg/L）	Outflow Volume (mL)	NH4 (mg/L)	NO3 (mg/L)	TN (mg/L）	TP (mg/L）	Outflow Volume (mL)	NH4 (mg/L)	NO3 (mg/L)	TN (mg/L）	TP (mg/L）
CN	95	0.755	11.314	12.563	0.127	118	1.033	5.133	13.06	0.076	250	0.572	5.205	12.52	0.159	257	0.91	5.768	7.258	0.117	260	0.844	8.601	10.753	0.164	270	0.717	7.862	10.019	0.122	194	0.583	8.725	10.71	0.241
P-0.5	73	0.644	3.612	3.665	0.042	105	1.285	2.535	5.034	0.012	232	1.565	2.837	6.228	0.054	238	1.079	2.364	3.069	0.071	236	1.066	3.173	4.285	0.059	236	1.386	3.392	4.627	0.047	259	1.247	3.702	4.747	0.053
P-1.0	97	0.79	3.69	3.768	0.021	89	1.264	2.729	3.723	0.026	211	1.692	2.896	6.696	0.051	209	0.941	2.554	3.07	0.056	214	1.211	2.812	3.854	0.041	210	0.862	2.963	4.239	0.056	213	1.032	2.926	3.66	0.044
P-1.5	74	0.963	4.004	4.51	0.076	100	1.139	1.697	4.96	0.067	210	1.046	2.363	4.238	0.096	216	0.763	2.221	2.85	0.051	218	0.633	3.551	4.02	0.057	200	1.151	3.39	4.416	0.031	139	0.765	3.265	4.065	0.04
P-2.0	98	0.794	2.646	3.672	0.052	104	1.515	1.682	4.832	0.105	213	1.078	1.913	3.634	0.048	195	0.736	1.818	2.683	0.039	213	1.065	3.031	4.269	0.038	206	0.883	3.06	4.512	0.114	120	0.817	3.027	4.344	0.053
P-2.5	108	0.777	3.476	3.614	0.121	105	1.632	1.674	4.329	0.108	232	1.709	2.107	6.21	0.079	263	1.117	1.862	2.921	0.062	236	1.461	2.292	4.061	0.166	214	1.663	2.602	4.636	0.064	88	1.592	2.899	4.547	0.053
B-0.5	67	0.456	3.54	4.81	0.128	105	0.937	2.389	7.889	0.135	258	0.599	2.699	5.093	0.096	258	0.49	2.498	3.943	0.065	273	0.589	3.947	6.337	0.081	236	0.448	4.005	5.636	0.266	208	0.345	4.078	5.518	0.195
B-1.0	80	0.747	5.595	5.411	0.318	93	0.577	5.651	5.475	0.398	244	0.406	5.703	4.588	0.24	224	0.713	4.847	8.436	0.239	216	0.581	3.84	2.853	0.357	214	0.55	2.822	8.857	0.066	124	0.52	4.783	5.536	0.514
B-1.5	94	1.296	6.287	9.319	0.347	90	1.019	6.351	7.155	0.05	201	0.627	7.138	8.296	0.102	206	0.575	6.616	5.518	0.208	204	1.139	5.473	6.012	0.74	198	0.871	3.98	11.366	0.027	105	0.785	5.369	7.805	0.337
B-2.0	94	1.208	8.061	8.767	0.294	86	1.709	8.558	7.608	0.201	233	0.274	5.487	8.553	0.389	225	0.48	4.648	6.779	0.435	219	0.896	4.661	5.566	0.411	194	0.715	3.985	4.829	0.145	120	0.939	4.982	5.439	0.239
B-2.5	86	0.457	7.225	10.535	0.194	107	1.241	8.718	9.475	0.128	234	0.315	6.261	8.113	0.173	237	0.693	5.796	7.563	0.212	229	1.044	5.146	6.706	0.724	220	1.439	4.668	6.571	0.192	70	1.162	5.225	6.478	0.996
6th Simulated Rainfall
Device	Sampling Time (min)
	5					10					20					30					40					50					60
	Outflow Volume (mL)	NH4 (mg/L)	NO3 (mg/L)	TN (mg/L）	TP (mg/L）	Outflow Volume (mL)	NH4 (mg/L)	NO3 (mg/L)	TN (mg/L）	TP (mg/L）	Outflow Volume (mL)	NH4 (mg/L)	NO3 (mg/L)	TN (mg/L）	TP (mg/L）	Outflow Volume (mL)	NH4 (mg/L)	NO3 (mg/L)	TN (mg/L）	TP (mg/L）	Outflow Volume (mL)	NH4 (mg/L)	NO3 (mg/L)	TN (mg/L）	TP (mg/L）	Outflow Volume (mL)	NH4 (mg/L)	NO3 (mg/L)	TN (mg/L）	TP (mg/L）	Outflow Volume (mL)	NH4 (mg/L)	NO3 (mg/L)	TN (mg/L）	TP (mg/L）
CN	76	1.373	9.55	12.232	0.236	109	0.805	9.826	10.398	0.11	221	0.713	9.132	10.483	0.063	230	0.53	7.696	8.308	0.19	227	0.998	6.949	14.723	0.118	254	0.96	7.367	14.249	0.187	166	0.922	7.314	11.729	0.103
P-0.5	67	0.445	4.503	4.673	0.048	104	1.207	4.337	4.085	0.039	220	0.307	4.217	3.829	0.057	228	0.674	2.774	3.635	0.093	223	1.015	3.48	4.909	0.015	234	1.4	2.028	5.379	0.021	224	1.13	3.959	3.993	0.051
P-1.0	80	0.357	3.7	3.368	0.05	83	0.357	3.428	3.182	0.044	204	0.635	4.291	3.1	0.095	229	0.639	3.095	3.496	0.121	229	1.04	2.365	4.406	0.036	235	1.408	1.346	5.055	0.042	223	0.815	3.209	3.886	0.067
P-1.5	74	1.351	3.812	4.901	0.033	103	1.969	3.585	4.338	0.022	207	0.614	3.857	3.731	0.029	200	0.467	3.165	4.033	0.036	213	0.983	2.933	3.964	0.124	223	0.767	2.12	4.004	0.033	166	1.175	3.064	4.203	0.171
P-2.0	85	1.332	3.409	4.199	0.078	92	1.885	3.442	4.133	0.025	187	0.302	3.474	3.916	0.046	182	0.529	2.953	4.127	0.079	181	0.988	2.34	3.273	0.072	193	0.788	1.719	2.45	0.079	133	1.036	2.914	7.136	0.087
P-2.5	94	0.784	2.877	4.096	0.049	101	0.799	3.126	4.049	0.023	212	0.878	3.399	4.402	0.045	213	1.725	2.939	4.454	0.057	215	1.261	2.565	3.733	0.128	216	1.886	1.799	3.985	0.042	150	0.73	3.175	6.864	0.047
B-0.5	70	0.161	3.595	6.084	0.149	109	0.878	3.631	5.574	0.198	242	0.103	4.081	6.055	0.166	230	0.347	3.783	4.649	0.11	237	1.034	3.129	5.39	0.215	242	0.579	2.276	1.638	0.144	240	0.761	3.07	3.585	0.187
B-1.0	75	0.738	3.487	6.852	0.161	98	0.585	4.865	7.69	0.205	212	0.369	4.818	6.588	0.16	217	0.333	5.493	4.475	0.084	213	0.679	5.786	6.53	0.147	217	0.514	2.983	7.243	0.041	174	0.453	2.528	6.683	0.106
B-1.5	90	0.653	4.464	4.248	0.179	100	0.566	4.774	6.814	0.281	211	0.389	3.211	4.289	0.46	209	0.653	2.808	3.183	0.142	209	0.535	2.834	5.597	0.214	210	0.535	2.165	4.693	0.021	149	0.498	2.806	4.863	0.18
B-2.0	113	0.713	4.995	4.784	0.196	121	0.597	5.465	5.923	0.241	244	0.733	4.114	4.756	0.176	247	0.503	3.789	3.38	0.228	240	0.53	3.586	5.641	0.122	246	0.6	2.913	5.21	0.444	185	0.321	3.489	5.511	0.145
B-2.5	96	1.209	7.3	8.307	0.247	120	1.107	6.66	8.469	0.295	240	0.74	5.6	5.985	0.214	237	0.243	4.649	5.434	0.288	255	0.59	4.336	5.458	0.166	240	0.738	4.073	5.075	0.604	95	0.377	4.428	4.828	0.209
7th Simulated Rainfall
Device	Sampling Time (min)
	5					10					20					30					40					50					60
	Outflow Volume (mL)	NH4 (mg/L)	NO3 (mg/L)	TN (mg/L）	TP (mg/L）	Outflow Volume (mL)	NH4 (mg/L)	NO3 (mg/L)	TN (mg/L）	TP (mg/L）	Outflow Volume (mL)	NH4 (mg/L)	NO3 (mg/L)	TN (mg/L）	TP (mg/L）	Outflow Volume (mL)	NH4 (mg/L)	NO3 (mg/L)	TN (mg/L）	TP (mg/L）	Outflow Volume (mL)	NH4 (mg/L)	NO3 (mg/L)	TN (mg/L）	TP (mg/L）	Outflow Volume (mL)	NH4 (mg/L)	NO3 (mg/L)	TN (mg/L）	TP (mg/L）	Outflow Volume (mL)	NH4 (mg/L)	NO3 (mg/L)	TN (mg/L）	TP (mg/L）
CN	79	0.462	7.168	13.344	0.168	108	0.471	8.742	12.459	0.121	247	0.517	8.125	10.296	0.231	268	1.016	9.282	10.572	0.262	266	0.743	11.006	9.509	0.246	259	1.111	6.572	7.739	0.082	212	0.43	6.037	7.936	0.152
P-0.5	68	0.388	5.242	5.816	0.043	102	0.775	4.785	5.164	0.056	239	0.944	4.604	4.857	0.04	231	0.651	3.416	3.874	0.026	236	0.643	1.819	3.772	0.047	236	0.836	3.013	4.058	0.011	213	0.752	2.511	3.517	0.03
P-1.0	95	0.469	6.977	5.448	0.04	65	0.988	4.046	4.737	0.059	237	1.018	4.178	4.648	0.101	213	0.734	1.775	3.943	0.035	215	0.775	1.173	3.918	0.045	215	0.929	3.072	2.336	0.004	210	0.936	1.864	2.93	0.04
P-1.5	61	0.809	4.899	5.635	0.045	93	0.976	2.835	4.816	0.054	223	0.899	4.162	4.927	0.039	213	0.662	1.437	4.163	0.053	220	0.569	0.961	3.178	0.03	220	1.044	4.15	2.36	0.111	159	0.695	2.606	2.872	0.038
P-2.0	53	0.384	3.262	5.531	0.084	82	0.774	2.88	4.812	0.039	195	0.82	5.441	4.406	0.046	192	0.54	1.655	3.443	0.089	209	0.729	1.588	3.487	0.091	209	0.838	1.815	2.704	0.055	181	0.825	1.773	2.958	0.051
P-2.5	54	1.354	3.715	5.836	0.061	78	0.773	1.607	5.341	0.078	223	0.863	2.243	4.508	0.075	213	0.893	2.129	3.97	0.099	234	0.584	3.523	3.732	0.069	234	0.819	3.396	3.207	0.062	158	0.668	3.278	3.005	0.086
B-0.5	69	0.227	5.234	6.824	0.143	88	0.215	2.422	7.058	0.056	230	0.398	3.086	5.197	0.038	233	0.457	2.746	4.673	0.104	250	0.627	3.492	4.402	0.237	250	0.915	4	3.881	0.153	194	0.517	4.585	3.666	0.095
B-1.0	78	0.855	5.672	9.313	0.243	116	0.529	4.198	8.003	0.12	217	0.461	3.978	6.794	0.134	220	0.348	3.466	5.377	0.267	217	0.651	4.971	4.854	0.261	217	0.593	4.901	4.654	0.181	170	0.641	5.985	4.753	0.153
B-1.5	65	0.244	5.919	8.478	0.143	84	0.231	4.603	8.785	0.185	161	0.428	5.157	6.919	0.179	198	0.492	4.231	6.49	0.235	208	0.675	4.521	6.073	0.168	208	0.985	4.909	6.219	0.155	163	0.556	5.586	4.945	0.196
B-2.0	107	1.078	7.15	8.091	0.314	104	1.436	3.309	7.359	0.124	217	0.245	4.215	6.164	0.096	231	0.414	3.751	5.392	0.208	220	0.812	4.77	4.973	0.485	220	0.565	5.463	5.105	0.342	148	0.816	6.263	4.38	0.211
B-2.5	93	0.22	6.411	5.994	0.185	156	1.178	4.232	5.691	0.34	239	0.124	4.661	7.686	0.739	299	0.519	4.135	6.251	0.128	226	1.509	7.148	4.519	0.253	226	0.774	6.838	8.684	0.104	58	1.023	7.37	7.028	0.038
8th Simulated Rainfall
Device	Sampling Time (min)
	5					10					20					30					40					50					60
	Outflow Volume (mL)	NH4 (mg/L)	NO3 (mg/L)	TN (mg/L）	TP (mg/L）	Outflow Volume (mL)	NH4 (mg/L)	NO3 (mg/L)	TN (mg/L）	TP (mg/L）	Outflow Volume (mL)	NH4 (mg/L)	NO3 (mg/L)	TN (mg/L）	TP (mg/L）	Outflow Volume (mL)	NH4 (mg/L)	NO3 (mg/L)	TN (mg/L）	TP (mg/L）	Outflow Volume (mL)	NH4 (mg/L)	NO3 (mg/L)	TN (mg/L）	TP (mg/L）	Outflow Volume (mL)	NH4 (mg/L)	NO3 (mg/L)	TN (mg/L）	TP (mg/L）	Outflow Volume (mL)	NH4 (mg/L)	NO3 (mg/L)	TN (mg/L）	TP (mg/L）
CN	66	0.683	7.918	12.591	0.197	122	1.371	7.849	11.523	0.389	238	0.855	7.918	11.729	0.262	245	0.671	9.111	9.893	0.14	255	0.881	7.359	7.891	0.078	232	0.632	4.908	7.807	0.151	184	0.515	6.652	7.647	0.047
P-0.5	43	0.409	8.763	5.559	0.024	98	0.861	4.771	5.31	0.102	241	0.888	4.667	5.381	0.068	220	0.64	2.1	3.954	0.017	241	0.676	1.412	3.724	0.017	238	0.811	3.442	3.551	0.014	238	0.816	2.246	3.645	0.001
P-1.0	52	1.111	3.469	5.524	0.062	76	0.974	3.047	4.798	0.109	219	0.759	3.968	5.087	0.1	223	0.916	3.268	4.227	0.018	222	0.879	2.102	4.058	0.026	214	0.719	1.29	2.123	0.041	259	0.719	3.001	3.248	0.021
P-1.5	69	1.403	3.363	5.054	0.04	100	0.836	3.076	4.474	0.074	214	0.917	3.301	5.102	0.161	211	0.814	2.807	4.156	0.027	227	0.602	2.795	3.351	0.055	214	0.805	2.03	2.439	0.022	163	0.683	3.102	3.013	0.008
P-2.0	81	1.26	2.623	4.922	0.09	96	0.991	2.6	4.163	0.079	209	0.723	2.623	4.311	0.112	202	0.29	3.018	3.535	0.043	196	0.593	2.438	3.388	0.039	208	0.554	1.626	2.894	0.045	150	0.964	2.203	3.043	0.01
P-2.5	112	1.179	6.8	4.965	0.098	106	1.57	2.527	4.557	0.115	222	0.268	3.624	4.127	0.172	219	0.453	1.827	3.626	0.043	234	0.888	1.109	3.063	0.036	239	0.618	3.005	3.172	0.033	72	0.893	1.624	3.142	0.003
B-0.5	56	0.46	4.528	6.787	0.251	131	0.878	3.349	6.104	0.257	215	0.625	3.554	5.227	0.302	258	0.426	3.134	4.872	0.141	257	0.618	3.451	4.32	0.032	218	0.512	3.636	4.233	0.166	253	0.473	3.591	4.173	0.051
B-1.0	98	0.513	6.73	7.52	0.173	103	0.703	6.092	6.79	0.204	199	0.389	5.726	6.317	0.188	204	0.619	4.309	5.85	0.137	207	0.574	2.231	5.331	0.114	285	0.488	3.73	4.854	0.207	109	0.396	3.182	5.242	0.137
B-1.5	88	0.354	13.797	8.338	0.163	100	0.566	7.551	8.035	0.312	192	0.758	2.471	6.213	0.222	197	0.421	4.3	6.424	0.151	185	0.542	2.92	5.199	0.219	195	0.386	4.118	5.338	0.182	135	0.462	2.492	5.132	0.168
B-2.0	101	0.511	12.442	8.309	0.133	110	0.975	4.625	7.446	0.279	207	0.694	6.63	6.42	0.292	228	0.474	3.343	5.77	0.191	215	0.686	2.029	5.365	0.25	223	0.568	5.498	5.268	0.285	113	0.526	2.972	4.734	0.272
B-2.5	49	0.384	11.675	4.762	0.313	87	0.807	7.845	5.369	0.181	221	0.845	5.233	6.768	0.565	240	0.552	5.858	5.968	0.243	240	0.722	3.623	4.105	0.303	201	0.823	5.582	10.226	0.277	138	0.787	3.615	5.816	0.043
9th Simulated Rainfall
Device	Sampling Time (min)
	5					10					20					30					40					50					60
	Outflow Volume (mL)	NH4 (mg/L)	NO3 (mg/L)	TN (mg/L）	TP (mg/L）	Outflow Volume (mL)	NH4 (mg/L)	NO3 (mg/L)	TN (mg/L）	TP (mg/L）	Outflow Volume (mL)	NH4 (mg/L)	NO3 (mg/L)	TN (mg/L）	TP (mg/L）	Outflow Volume (mL)	NH4 (mg/L)	NO3 (mg/L)	TN (mg/L）	TP (mg/L）	Outflow Volume (mL)	NH4 (mg/L)	NO3 (mg/L)	TN (mg/L）	TP (mg/L）	Outflow Volume (mL)	NH4 (mg/L)	NO3 (mg/L)	TN (mg/L）	TP (mg/L）	Outflow Volume (mL)	NH4 (mg/L)	NO3 (mg/L)	TN (mg/L）	TP (mg/L）
CN	71	0.826	6.325	11.993	0.131	102	0.638	4.021	10.866	0.074	231	0.45	4.572	10.468	0.079	240	0.789	4.346	10.366	0.091	243	0.643	7.245	8.123	0.074	245	0.608	7.314	7.837	0.128	227	0.575	7.235	8.1	0.265
P-0.5	73	1.117	3.9	6.003	0.072	115	1.582	3.613	4.253	0.017	197	0.253	4.522	5.277	0.088	230	0.444	3.262	3.969	0.008	231	0.829	2.493	3.42	0.01	230	0.661	1.418	3.292	0.024	223	0.869	3.382	3.569	0.048
P-1.0	63	1.278	4.605	6.388	0.009	88	0.749	2.089	4.547	0.094	201	0.664	2.119	4.939	0.047	208	0.494	2.348	3.988	0.045	213	0.929	3.501	3.794	0.034	215	0.894	3.2	2.13	0.068	228	0.859	3.551	3.135	0.003
P-1.5	58	0.33	3.849	5.017	0.066	98	0.33	1.631	4.354	0.038	214	0.587	2.272	4.895	0.12	209	0.59	2.135	3.879	0.051	218	0.962	3.414	3.185	0.064	215	1.301	3.259	2.764	0.059	177	0.753	3.138	3.113	0.009
P-2.0	83	0.992	2.657	4.854	0.029	102	1.404	1.689	3.998	0.145	197	0.225	1.921	4.514	0.067	192	0.394	1.825	3.346	0.056	199	0.736	3.043	3.128	0.036	192	0.587	3.072	2.897	0.086	153	0.771	3.039	3.231	0.041
P-2.5	67	0.191	3.226	5.047	0.045	89	1.04	3.258	4.114	0.042	206	0.122	3.288	4.107	0.047	200	0.411	2.795	3.796	0.045	218	1.224	2.214	3.109	0.083	215	0.685	1.627	3.062	0.188	185	0.901	2.758	3.405	0.059
B-0.5	55	0.823	3.529	6.469	0.226	106	0.653	3.565	5.735	0.116	245	0.411	4.007	4.713	0.025	248	0.371	3.714	4.437	0.11	257	0.757	3.072	4.194	0.098	257	0.574	2.234	4.334	0.192	229	0.505	3.014	4.236	0.235
B-1.0	87	0.673	5.332	7.677	0.163	103	0.564	5.487	6.463	0.196	223	0.692	5.099	5.846	0.181	223	0.475	4.297	5.775	0.133	216	0.5	3.88	5.04	0.114	217	0.566	4.113	4.866	0.21	146	0.303	4.084	4.844	0.14
B-1.5	55	0.608	6.162	9.354	0.17	92	0.568	5.935	8.618	0.318	196	0.467	5.772	5.961	0.218	198	0.532	3.796	6.095	0.155	196	0.502	4.763	5.024	0.233	196	0.441	2.775	5.004	0.193	174	0.41	5.418	4.888	0.177
B-2.0	82	0.912	5.824	8.759	0.136	102	0.521	5.881	7.969	0.275	212	0.582	5.936	6.834	0.292	212	0.602	5.045	5.666	0.192	205	0.393	3.997	5.304	0.259	209	0.551	2.937	5.024	0.298	167	0.45	4.978	5.051	0.293
B-2.5	74	1.226	5.503	5.94	0.242	102	0.994	5.978	6.421	0.175	232	0.734	6.501	6.311	0.295	221	0.295	5.621	6.691	0.382	246	0.617	4.907	5.204	0.318	232	0.583	3.441	8.059	0.253	101	1.017	6.072	6.421	0.344
10th Simulated Rainfall
Device	Sampling Time (min)
	5					10					20					30					40					50					60
	Outflow Volume (mL)	NH4 (mg/L)	NO3 (mg/L)	TN (mg/L）	TP (mg/L）	Outflow Volume (mL)	NH4 (mg/L)	NO3 (mg/L)	TN (mg/L）	TP (mg/L）	Outflow Volume (mL)	NH4 (mg/L)	NO3 (mg/L)	TN (mg/L）	TP (mg/L）	Outflow Volume (mL)	NH4 (mg/L)	NO3 (mg/L)	TN (mg/L）	TP (mg/L）	Outflow Volume (mL)	NH4 (mg/L)	NO3 (mg/L)	TN (mg/L）	TP (mg/L）	Outflow Volume (mL)	NH4 (mg/L)	NO3 (mg/L)	TN (mg/L）	TP (mg/L）	Outflow Volume (mL)	NH4 (mg/L)	NO3 (mg/L)	TN (mg/L）	TP (mg/L）
CN	87	1.046	9.511	13.174	0.153	107	0.623	10.171	12.177	0.086	226	0.683	6.841	9.523	0.047	243	0.606	5.983	11.481	0.208	249	0.449	6.038	10.146	0.085	234	0.6	4.614	8.052	0.082	228	0.509	5.977	8.125	0.115
P-0.5	63	0.647	4.094	6.592	0.042	98	1.298	4.479	4.341	0.018	217	0.809	3.372	5	0.013	243	0.635	3.105	4.082	0.061	247	0.835	2.939	3.636	0.006	233	0.598	2.387	3.948	0.016	210	0.488	2.86	3.654	0.047
P-1.0	85	0.78	8.506	6.254	0.026	104	1.073	5.224	4.457	0.008	195	0.589	1.667	4.48	0.024	216	0.942	2.776	3.693	0.103	226	0.872	1.895	3.637	0.018	214	0.76	2.825	2.326	0.036	193	0.627	1.685	2.975	0.037
P-1.5	76	0.501	7.119	5.503	0.044	118	0.844	2.536	4.611	0.032	189	1.193	3.704	4.65	0.054	206	0.617	2.176	3.823	0.07	214	0.771	1.168	2.972	0.058	212	0.565	3.314	2.63	0.046	151	0.78	1.723	2.696	0.063
P-2.0	78	0.515	4.569	5.399	0.044	134	0.965	3.244	4.575	0.029	177	0.661	2.263	4.566	0.04	198	0.472	2.382	3.226	0.081	193	0.708	1.454	3.186	0.098	205	0.586	2.408	2.679	0.055	146	0.539	1.458	3.009	0.052
P-2.5	44	0.624	3.173	5.574	0.093	87	1.253	2.349	4.531	0.024	210	0.781	2.226	4.215	0.09	219	0.613	1.939	3.906	0.083	218	0.806	2.781	3.559	0.041	208	0.577	2.742	2.909	0.057	215	0.471	3.349	3.111	0.084
B-0.5	56	1.071	3.843	6.732	0.193	103	0.981	4.175	6.864	0.15	262	0.656	3.815	4.851	0.153	236	0.216	3.27	4.404	0.146	253	0.523	2.931	4.423	0.166	197	0.654	2.942	4.113	0.065	293	0.334	3.287	3.913	0.131
B-1.0	86	0.875	6.62	9.607	0.234	133	1.165	3.017	7.698	0.184	207	0.199	3.031	6.353	0.113	233	0.336	3.383	5.364	0.104	213	0.658	5.033	4.637	0.206	231	0.459	4.719	4.714	0.157	146	0.662	5.321	4.536	0.142
B-1.5	72	0.229	6.254	8.575	0.254	116	0.63	2.705	8.496	0.223	185	0.148	3.777	5.984	0.173	209	0.405	3.585	5.552	0.209	168	0.627	5.931	5.292	0.201	197	0.725	5.717	5.256	0.164	131	0.611	5.518	4.534	0.164
B-2.0	83	0.832	5.205	9.259	0.313	119	1.179	3.248	8.551	0.242	220	0.367	3.553	7.122	0.17	220	0.289	3.535	5.748	0.299	214	0.654	6.101	5.338	0.244	202	0.512	6.159	5.286	0.23	146	0.83	6.051	4.832	0.218
B-2.5	94	0.437	6.279	5.559	0.282	112	0.443	5.515	5.859	0.156	231	0.481	7.182	4.647	0.497	214	0.948	5.914	10.13	0.249	241	0.679	3.806	5.433	0.274	225	0.986	2.335	6.399	0.263	100	0.417	5.433	5.071	0.039
